# Supplementary material
Source: Springer Nature journal article supplement (https://www.springermedizin.de/resource/supplementary/12936_2012_2579_MOESM6_ESM.pdf/9543262)
Supplement: MOESM6 [file 9543262]

# PANEL OF MICROSATELLITE LOCI

(Format data Ms Toolkit 3.1.1)

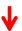

## GENETIC DIVERSITY

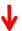

## MULTIPLICITY OF INFECTION

(Arlequin 3.5.1.2)

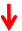

## LINKAGE DISEQUILIBRIUM

(LIAN 3.5 and Arlequin 3.5.1.2)

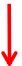

## CLUSTER DETERMINATION

Structure 2.3.3

Fstat 2.9.3.2

### Population information

- Neutral ms loci

### Locus information

- Allele frequency and distribution
- $H_e$
- Low frequency alleles
- Variable vs Conserved loci

### Haplotype determination

(single infections)

### Selection (if using linked loci)

Non-random mating (neutral loci)

Neutral ms loci

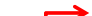

### Population structure

- Clonal expansions
- Imported cases

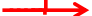

### Haplotypic differentiation

- Reinfection vs Recrudescence

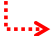

### Drug Resistant lineages

Flanking ms loci
